# Supplementary material for: A Cross-Sectional, Multicentric Clinico-Epidemiological Study of Melasma in India
Source: PubMed Central journal article supplement — Dermatol Ther (Heidelb). 2014 Mar 19;4(1):71–81. doi: 10.1007/s13555-014-0046-1 (PMC4065278; doi:10.1007/s13555-014-0046-1), 2014-03-19
Supplement: 13555_2014_46_MOESM1_ESM.pdf [file 13555_2014_46_MOESM1_ESM.pdf]

- This is a cross sectional, multicentric clinico-epidemiological study of melasma in India
- Of 331 patients with mean age  $37.2 \pm 9.3$  years (range 20 - 62 years) with melasma included in the study, the prevalence of melasma was higher in females with a female to male ratio of approximately 4:1.
- There is a regional variability in the demographics, clinical manifestations and factors that precipitate melasma among patients in India.
- Sun exposure is a major precipitating factor in melasma but only 10% of the patients used sunscreen with sun protection factor  $>50$ .
- Overall, 51% of the patients had not received any treatment for melasma. However, 71% of the patients who had tried previous treatments had used triple combination with majority having used a mometasone based triple combination.
- A large proportion of patients were unsatisfied with their current treatment for melasma.

This summary slide represents the opinions of the authors. Sponsorship for this study was funded by Wockhardt Ltd (Mumbai, India). Medical writing assistance for this study was provided by Knowledge Isotopes Pvt. Ltd. (Mohali, Punjab, India) . For a full list of acknowledgments and conflicts of interest for all authors of this article, please see the full text online. Copyright © The Authors 2014. Creative Commons Attribution Noncommercial License (CC BY-NC).
